# Supplementary material
Source: ML conference proceedings conference paper supplement (https://aclanthology.org/N18-1124)
Supplement: Notes [file N18-1124.Notes.pdf]

## A Detailed Architecture

This appendix describes in detail the implementation of the *self-attentive residual decoder* for NMT, which builds on the attention-based NMT implementation of `dl4mt-tutorial`<sup>1</sup>.

The input of the model is a source sentence denoted as 1-of-k coded vector, where each element of the sequence corresponds to a word:

$$x = (x_1, x_2, \dots, x_m), x_i \in \mathbb{R}^V$$

and the output is a target sentence denoted as well as 1-of-k coded vector:

$$y = (y_1, y_2, \dots, y_n), y_i \in \mathbb{R}^V$$

where  $V$  is the size of the vocabulary of target and source side,  $m$  and  $n$  are the lengths of the source and target sentences respectively. We omit the bias vectors for simplicity.

### A.1 Encoder

Each word of the source sentence is embedded in a  $e$ -dimensional vector space using the embedding matrix  $\bar{E} \in \mathbb{R}^{e \times V}$ . The hidden states are  $2d$ -dimensional vectors modeled by a bi-directional GRU. The forward states  $\vec{h} = (\vec{h}_1, \dots, \vec{h}_m)$  are computed as:

$$\vec{h}_i = \vec{z}_i \odot \vec{h}_{i-1} + (1 - \vec{z}_i) \odot \vec{h}'_i$$

where

$$\begin{aligned} \vec{h}'_i &= \tanh(\vec{W}\bar{E}x_i + \vec{U}[\vec{r}_i \odot \vec{h}_{i-1}]) \\ \vec{z}_i &= \sigma(\vec{W}_z\bar{E}x_i + \vec{U}_z\vec{h}_{i-1}) \\ \vec{r}_i &= \sigma(\vec{W}_r\bar{E}x_i + \vec{U}_r\vec{h}_{i-1}) \end{aligned}$$

Here,  $\vec{W}, \vec{W}_z, \vec{W}_r \in \mathbb{R}^{d \times e}$  and  $\vec{U}, \vec{U}_z, \vec{U}_r \in \mathbb{R}^{d \times d}$  are weight matrices. The backward states  $\overleftarrow{h} = (\overleftarrow{h}_1, \dots, \overleftarrow{h}_m)$  are computed in similar manner. The embedding matrix  $\bar{E}$  is shared for both passes, and the final hidden states are formed by the concatenation of them:

$$h_i = \begin{bmatrix} \vec{h}_i \\ \overleftarrow{h}_i \end{bmatrix}$$

<sup>1</sup><https://github.com/nyu-dl/dl4mt-tutorial>

## A.2 Attention Mechanism

The *context vector* at time  $t$  is calculated by:

$$c_t = \sum_{i=1}^m \alpha_i^t h_i$$

where

$$\begin{aligned} \alpha_i^t &= \frac{\exp(e_i^t)}{\sum_j \exp(e_j^t)} \\ e_i^t &= v_a^T \tanh(W_d s_{t-1} + W_e h_i) \end{aligned}$$

Here,  $v_a \in \mathbb{R}^d$ ,  $W_d \in \mathbb{R}^{d \times d}$  and  $W_e \in \mathbb{R}^{d \times 2d}$  are weight matrices.

### A.3 Decoder

The input of the decoder are the previous word  $y_{t-1}$  and the *context vector*  $c_t$ , the objective is to predict  $y_t$ . The hidden states of the decoder  $s = (s_1, \dots, s_n)$  are initialized with the mean of the *context vectors*:

$$s_0 = \tanh(W_{init} \frac{1}{m} \sum_{i=1}^m c_i)$$

where  $W_{init} \in \mathbb{R}^{d \times 2d}$  is a weight matrix,  $m$  is the size of the source sentence. The following hidden states are calculated with a GRU conditioned over the *context vector* at time  $t$  as follows:

$$s_t = z_t \odot s'_t + (1 - z_t) \odot s''_t$$

where

$$\begin{aligned} s''_t &= \tanh(Ey_{t-1} + U[r_t \odot s_{t-1}] + Cc_t) \\ z_t &= \sigma(W_z Ey_{t-1} + U_z s_{t-1} + C_z c_t) \\ r_t &= \sigma(W_r Ey_{t-1} + U_r s_{t-1} + C_r c_t) \end{aligned}$$

Here,  $E \in \mathbb{R}^{e \times V}$  is the embedding matrix for the target language.  $W, W_z, W_r \in \mathbb{R}^{d \times e}$ ,  $U, U_z, U_r \in \mathbb{R}^{d \times d}$ , and  $C, C_z, C_r \in \mathbb{R}^{d \times 2d}$  are weight matrices. The intermediate vector  $s'_t$  is calculated from a simple GRU:

$$s'_t = GRU(y_{t-1}, s_{t-1})$$

In the attention-based NMT model, the probability of a target word  $y_t$  is given by:

$$p(y_t | s_t, y_{t-1}, c_t) = \text{softmax}(W_o \tanh(W_{st} s_t + W_{yt} y_{t-1} + W_{ct} c_t))$$

Here,  $W_o \in \mathbb{R}^{V \times e}$ ,  $W_{st} \in \mathbb{R}^{e \times d}$ ,  $W_{yt} \in \mathbb{R}^{e \times e}$ ,  $W_{ct} \in \mathbb{R}^{e \times 2d}$  are weight matrices.

### A.3.1 Self-Attentive Residual Connections

In our model, the probability of a target word  $y_t$  is given by:

$$p(y_t|s_t, d_t, c_t) = \text{softmax}(W_o \tanh(W_{st}s_t + W_{dt}d_t + W_{ct}c_t))$$

Here,  $W_o \in \mathbb{R}^{V \times e}$ ,  $W_{st} \in \mathbb{R}^{e \times d}$ ,  $W_{dt}, W_{yt} \in \mathbb{R}^{e \times e}$ ,  $W_{ct} \in \mathbb{R}^{e \times 2d}$  are weight matrices. The summary vector  $d_t$  can be calculated in different manners based on previous words  $y_1$  to  $y_{t-1}$ . First, a simple average:

$$d_t^{avg} = \frac{1}{t-1} \sum_{i=1}^{t-1} y_i$$

The second, by using an attention mechanism:

$$d_t^{avg} = \sum_{i=1}^{t-1} \alpha_i^t y_i$$

$$\alpha_i^t = \frac{\exp(e_i^t)}{\sum_{j=1}^{t-1} \exp(e_j^t)}$$

$$e_i^t = v^\top \tanh(W_y y_i)$$

where  $v \in \mathbb{R}^e$ ,  $W_y \in \mathbb{R}^{e \times e}$  are weight matrices.

### A.3.2 Memory RNN

This model modifies the recurrent layer of the decoder as follows:

$$s_t = z_t \odot s'_t + (1 - z_t) \odot s''_t$$

where

$$s''_t = \tanh(Ey_{t-1} + U[r_t \odot \tilde{s}_t] + Cc_t)$$

$$z_t = \sigma(W_z Ey_{t-1} + U_z \tilde{s}_t + C_z c_t)$$

$$r_t = \sigma(W_r Ey_{t-1} + U_r \tilde{s}_t + C_r c_t)$$

Here,  $E \in \mathbb{R}^{e \times V}$  is the embedding matrix for the target language.  $W, W_z, W_r \in \mathbb{R}^{d \times e}$ ,  $U, U_z, U_r \in \mathbb{R}^{d \times d}$ , and  $C, C_z, C_r \in \mathbb{R}^{d \times 2d}$  are weight matrices. The intermediate vector  $s'_t$  is calculated from a simple GRU:

$$s'_t = GRU(y_{t-1}, \tilde{s}_t)$$

The recurrent vector  $\tilde{s}_t$  is calculated as following:

$$\tilde{s}_t = \sum_{i=1}^{t-1} \alpha_i^t s_i$$

$$\text{where } \alpha_i^t = \frac{\exp(e_i^t)}{\sum_{j=1}^{t-1} \exp(e_j^t)}$$

$$e_i^t = v^\top \tanh(W_m s_i + W_s s_t)$$

where  $v \in \mathbb{R}^d$ ,  $W_m \in \mathbb{R}^{d \times d}$ , and  $W_s \in \mathbb{R}^{d \times d}$  are weight matrices.

### A.3.3 Self-Attentive RNN

The formulation of this decoder is as following:

$$p(y_t|y_1, \dots, y_{t-1}, c_t) \approx \text{softmax}(W_o \tanh(W_{st}s_t + W_{yt}y_{t-1} + W_{ct}c_t + W_{mt}\tilde{s}_t))$$

Here,  $W_o \in \mathbb{R}^{V \times e}$ ,  $W_{st} \in \mathbb{R}^{e \times d}$ ,  $W_{yt} \in \mathbb{R}^{e \times e}$ ,  $W_{ct} \in \mathbb{R}^{e \times 2d}$ , and  $W_{mt} \in \mathbb{R}^{e \times d}$  are weight matrices.

$$\tilde{s}_t = \sum_{i=1}^{t-1} \alpha_i^t s_i$$

$$\alpha_i^t = \frac{\exp(e_i^t)}{\sum_{j=1}^{t-1} \exp(e_j^t)}$$

$$e_i^t = v^\top \tanh(W_m s_i + W_s s_t)$$

where  $v \in \mathbb{R}^d$ ,  $W_m \in \mathbb{R}^{d \times d}$ , and  $W_s \in \mathbb{R}^{d \times d}$  are weight matrices.
